# Supplementary material
Source: Springer Nature journal article supplement (https://www.springermedizin.de/resource/supplementary/12879_2013_3001_MOESM5_ESM.pdf/9446396)

**A - Overall**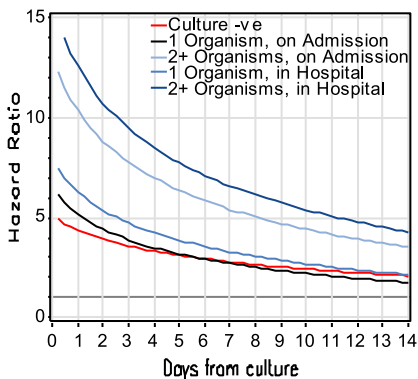**B - By Sex**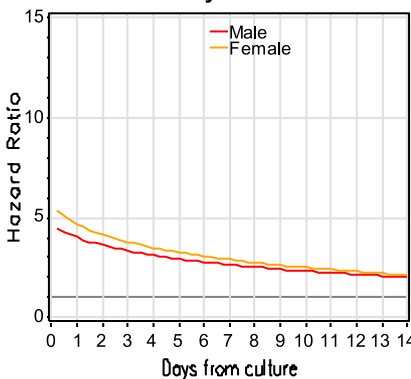**C - By Age**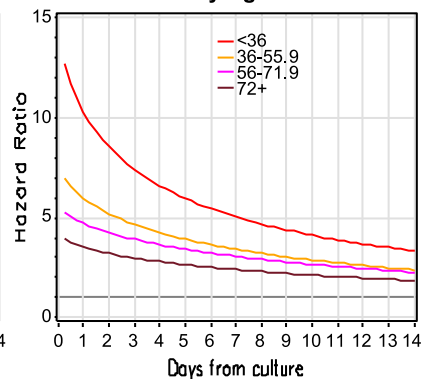**D - By Admission Urgency**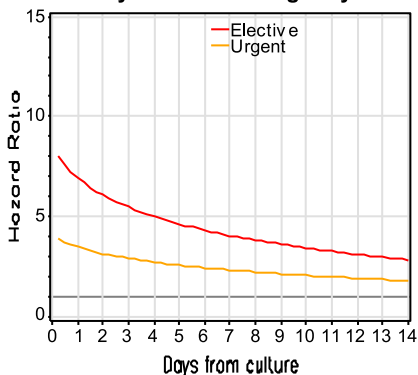**E - By Comorbidities**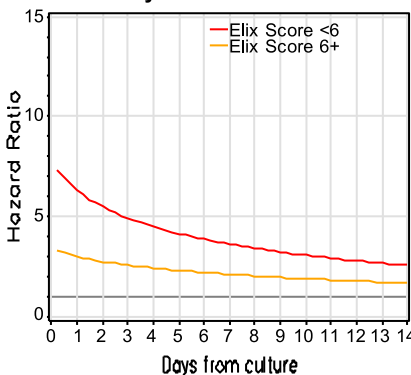**F - By Immunosuppressant, Culture -ve**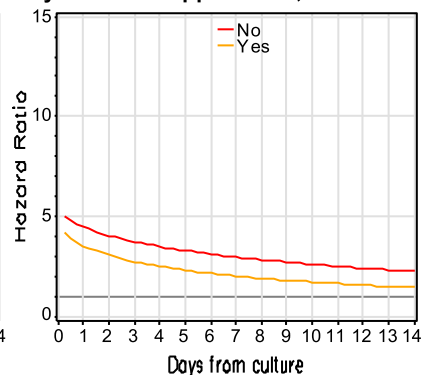**G - By Immunosuppressant, BSI**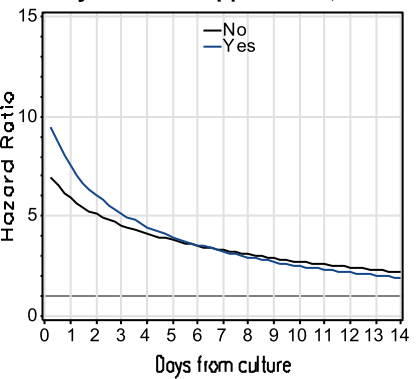**H - By ICU status**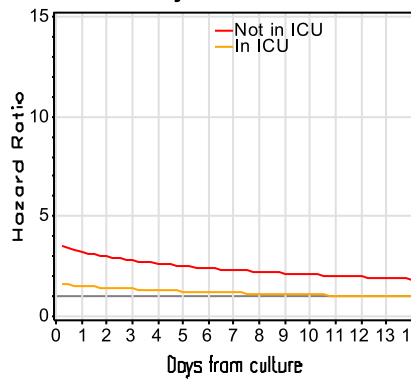**I - By Neutropenia**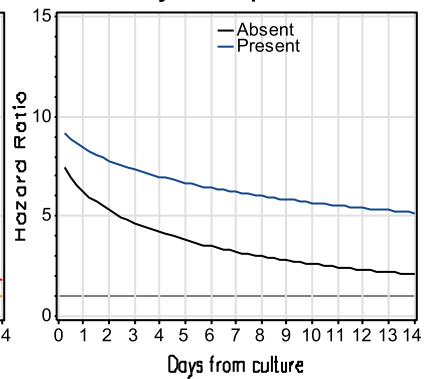

Supplement: MOESM5 [file 9446396]
